# Supplementary material for: Teaching the Process of Science: Faculty Perceptions and an Effective Methodology
Source: PubMed Central journal article supplement — CBE Life Sci Educ. 2010 Winter;9(4):524–35. doi: 10.1187/cbe.10-01-0005 (PMC2995770; doi:10.1187/cbe.10-01-0005), 2010
Supplement: supp_9_4_524__1.pdf [file supp_9_4_524__1.pdf]

# Faculty Survey on Undergraduate Science Process Skills

Page 1 of 1

Dear Respondent,

We are inviting you to participate in a research project to study the acquisition of science process skills during undergraduate education. Along with this letter is a short survey that asks a variety of questions about science process skills. We are asking you to look over the survey and, if you choose to do so, complete it and submit your responses. It should take you about 10 minutes to complete.

Through your participation we hope to understand faculty perspectives about the importance for science undergraduates to acquire such skills. We hope that the results of the survey will be useful for science faculty at all institutions. We may share the results of this project in a publication about the teaching of science process skills.

We do not know of any risks to you if you decide to participate in this online survey and guarantee that your responses will be anonymous as there is no personal information collected during the process. Your participation is voluntary.

If you have any questions or concerns about completing the survey or about being in this study, you may contact us by email (see below). The Institutional Review Board (IRB) at the Evergreen State College has approved this study.

Sincerely,

Clarissa Dirks  
The Evergreen State College  
[dirksc@evergreen.edu](mailto:dirksc@evergreen.edu)

Mary Pat Wenderoth  
University of Washington  
[mpw@u.washington.edu](mailto:mpw@u.washington.edu)

**Question 1.**

Faculty, please rank how important it is for an undergraduate majoring in the life sciences to obtain the following science process skills by the time they graduate with a four year degree.

Required.

|                                                                                | Very important        | Important             | Moderately important  | Of little importance  | Unimportant           |
|--------------------------------------------------------------------------------|-----------------------|-----------------------|-----------------------|-----------------------|-----------------------|
| Interpreting data: graphs and tables                                           | <input type="radio"/> |
| Interpreting data: gels, blots, microarrays, etc.                              | <input type="radio"/> |
| Interpreting data: ability to construct an argument from data                  | <input type="radio"/> |
| Understanding basic statistics                                                 | <input type="radio"/> |
| Reading and evaluating primary literature                                      | <input type="radio"/> |
| Conducting an effective literature search                                      | <input type="radio"/> |
| Ability to create a testable hypothesis                                        | <input type="radio"/> |
|                                                                                | Very important        | Important             | Moderately important  | Of little importance  | Unimportant           |
| Ability to design an experiment: identifying and controlling variables         | <input type="radio"/> |
| Ability to design an experiment: proper alignment of experiment and hypothesis | <input type="radio"/> |
| Ability to design an experiment: development of proper controls                | <input type="radio"/> |
| Creating the appropriate graph from data                                       | <input type="radio"/> |
| Communicating results: Oral                                                    | <input type="radio"/> |
| Communicating results: Written                                                 | <input type="radio"/> |
| Creating a bibliography and proper citation of references                      | <input type="radio"/> |

|                                                                                | Very important        | Important             | Moderately important  | Of little importance  | Unimportant           |
|--------------------------------------------------------------------------------|-----------------------|-----------------------|-----------------------|-----------------------|-----------------------|
| Working collaboratively to accomplish a task                                   | <input type="radio"/> |
| Being an effective peer mentor                                                 | <input type="radio"/> |
| Working independently when needed                                              | <input type="radio"/> |
| Knowing when to ask for guidance                                               | <input type="radio"/> |
| Being able to infer plausible reasons for failed experiments                   | <input type="radio"/> |
| Being able to effectively monitor their own learning progress                  | <input type="radio"/> |
| Ability to use basic online bioinformatics tools (NCBI databases, BLAST, etc.) | <input type="radio"/> |
|                                                                                | Very important        | Important             | Moderately important  | Of little importance  | Unimportant           |
| Problem solving/Critical thinking                                              | <input type="radio"/> |

**Question 2.**

If you could choose only 3 of the following skills to focus on, which are the \*most\* important for students to acquire?

|                                                               | Most Important<br>(choose 3) |
|---------------------------------------------------------------|------------------------------|
| Interpreting data                                             | <input type="checkbox"/>     |
| Understanding basic statistics                                | <input type="checkbox"/>     |
| Reading, evaluating, and locating primary literature          | <input type="checkbox"/>     |
| Ability to design an experiment                               | <input type="checkbox"/>     |
| Communicating results: Oral and Written                       | <input type="checkbox"/>     |
| Working collaboratively to accomplish a task                  | <input type="checkbox"/>     |
| Working independently when needed                             | <input type="checkbox"/>     |
| Knowing when to ask for guidance                              | <input type="checkbox"/>     |
| Being able to effectively monitor their own learning progress | <input type="checkbox"/>     |
| Problem solving/Critical thinking                             | <input type="checkbox"/>     |

**Question 3.**

Which of the following skills are the \*least\* important for students to acquire? Please choose 3 .

|                                                               | Least Important<br>(choose 3) |
|---------------------------------------------------------------|-------------------------------|
| Interpreting data                                             | <input type="checkbox"/>      |
| Understanding basic statistics                                | <input type="checkbox"/>      |
| Reading, evaluating, and locating primary literature          | <input type="checkbox"/>      |
| Ability to design an experiment                               | <input type="checkbox"/>      |
| Communicating results: Oral and Written                       | <input type="checkbox"/>      |
| Working collaboratively to accomplish a task                  | <input type="checkbox"/>      |
| Working independently when needed                             | <input type="checkbox"/>      |
| Knowing when to ask for guidance                              | <input type="checkbox"/>      |
| Being able to effectively monitor their own learning progress | <input type="checkbox"/>      |
| Problem solving/Critical thinking                             | <input type="checkbox"/>      |

**Question 4.**

What other skills do you think students should have by the time they graduate?

**Question 5.**

What percentage of time do you estimate that you spend teaching "skills" (as opposed to content)?

**Required.** Enter an integer (without commas). Limit response to three characters.

**Question 6.**

Do you feel that the amount of time you spend teaching science process skills is sufficient (Y/N)?

**Required.**

- Yes
- No

**Question 7.**

What prevents you from spending more time teaching science process skills? (check all that apply)

**Required.**

- I already spend adequate time teaching skills
- I don't know how to teach skills in a classroom format
- Teaching skills is too time-consuming
- I would have to re-work all of my lectures and course material
- I think students need to have adequate content before they can learn science process skills
- Other:

**Question 8.**

At what type of institution do you teach? (please choose the closest type)

**Required.**

- R1 University
- Non-R1 University
- 4-Year Liberal Arts College
- 2-Year Community College
- Research Institute

**Question 9.**

Please choose which of the following best describes your current position

Required.

- Faculty
- Postdoc

**Question 10.**

How many years have you taught?

Required. Enter a number (without commas). Limit response to two characters.

**Question 11.**

Please estimate how many freshmen/sophomore level classes you teach in a four year period.

Required. Enter a number (without commas). Limit response to two characters.

**Question 12.**

Please estimate how many junior/senior level classes you teach in a four year period.

Required. Enter a number (without commas). Limit response to two characters.

**Question 13.**

Other comments?

Submit responses
